# Supplementary material for: Formation of an Fe–H complex anion in YFe2: adjustment of imbalanced charge by using additional Li as an electron donor
Source: Royal Society of Chemistry journal article supplement (doi:10.1039/c2ra22497f), 2012-12-06
Supplement: c2ra22497f.pdf [file c2ra22497f.pdf]

## Formation of an Fe-H complex anion in YFe<sub>2</sub>: adjustment of imbalanced charge by additional Li as an electron donor

Motoaki Matsuo,<sup>a</sup> Hiroyuki Saitoh,<sup>b</sup> Akihiko Machida,<sup>b</sup> Ryutaro Sato,<sup>a</sup> Shigeyuki Takagi,<sup>a</sup> Kazutoshi Miwa,<sup>c</sup> Tetsu Watanuki,<sup>b</sup> Yoshinori Katayama,<sup>b</sup> Katsutoshi Aoki<sup>a,b</sup> and Shin-ichi Orimo<sup>\*a</sup>

<sup>a</sup> Institute for Materials Research, Tohoku University, Sendai, 980-8577, Japan,

<sup>b</sup> Quantum Beam Science Directorate, Japan Atomic Energy Agency, Sayo-cho 679-5148, Japan

<sup>c</sup> Toyota Central R&D Laboratories, Inc., Nagakute 480-1192, Japan

### Supporting information

#### Experimental procedures

##### **Synthesis of the complex hydride YLiFeH<sub>6</sub>**

A button ingot of YFe<sub>2</sub> was prepared by arc-melting high-purity metals Y and Fe (99.9% and 99.5%, respectively, Nilaco Corporation, Japan) under Ar. After the ingot was pulverized and sieved (100–300 μm), the powder was mixed with LiH (99.9%, Aldrich Co. Ltd.) in the molar ratio of 1:1 by mechanical milling at 400 rpm using a planetary Fritsch P7 with 20 steel balls (7 mm in diameter) in a hardened steel vial (30 cm<sup>3</sup> in volume) for 2 h under 0.1 MPa Ar. We used LiH instead of Li because ductile Li is unsuited for use in mechanical milling. The hydrogenation was conducted for the mixed powder in the temperature range of 873–1073 K at the hydrogen pressure of 6 GPa for 2–12 h with a cubic anvil-type high pressure apparatus in a similar manner as described previously.<sup>S1</sup>

##### **Structural characterizations**

The products recovered at ambient temperature and pressure were characterized by powder X-ray diffraction (XRD) measurements on a PANalytical X'Pert diffractometer with Cu-Kα radiation and a semiconductor detector for high-speed measurement and a high-resolution synchrotron x-ray powder diffractometer (SR-XRD, monochromatized 20 keV x-rays, λ = 0.61993 Å) constructed in the BL22XU at SPring-8, Japan, and by Raman spectroscopy using a Nicolet Almega-HD spectrometer equipped with color-CCD and 532-nm laser with back scattering geometry.

#### Theoretical procedures

All calculations were performed using a plane-wave basis and projector augmented wave (PAW) method<sup>S2</sup> within the generalized gradient approximation (GGA) with exchange and correlation functional of Perdew, Burke, and Ernzerhof (PBE),<sup>S3</sup> as implemented in Vienna Ab-initio Simulation Package (VASP).<sup>S4</sup> Well converged plane-wave basis sets, cutoff energy of 800 eV, were employed. The Brillouin zone sampling was performed using the special k points method<sup>S5</sup> with a 8 × 8 × 8 mesh.

### Detailed electronic structure of YLiFeH<sub>6</sub>

We first checked for the magnetic solutions, but found a non-spin-polarized structure is the most stable, reflecting the octahedral ligand coordination for the only magnetic constituent Fe, which stabilizes the non-spin-polarized configuration. Figure S1 shows (a) the calculated band structure for 9 atom primitive cell of YLiFeH<sub>6</sub> along the high-symmetry line in the Brillouin zone, and (b) the corresponding electronic density of states (DOS). Roughly speaking, the valence bands are comprised of six H 1s derived and three Fe 3d derived bands, making up an 18 electron count as in most of the complex hydrides with a K<sub>2</sub>PtCl<sub>6</sub> structure such as Mg<sub>2</sub>FeH<sub>6</sub>.<sup>S6</sup> The H 1s derived bands provide the DOS from -7.8 eV to -1.9 eV which is divided into two branches. The lower branch extends from -7.8 eV to -5.5 eV is a one-fold *a*<sub>1g</sub> band which is hybridized with the Fe 4s state, as may be seen from the moderate Fe 4s character in the corresponding DOS. The higher bands lie from -4.7 eV to -1.9 eV are three-fold and two-fold degenerated *t*<sub>1u</sub> and *e*<sub>g</sub> combination hybridized with the Fe 4p and Fe 3d states, respectively. The Fe 3d states are split into the lower-lying *t*<sub>2g</sub> bands, which give rise to the DOS peak just below the Fermi level, and the higher-lying *e*<sub>g</sub> branches, which form the bottom of the conduction bands, providing a band-gap of 1.7 eV. Thus the valence bands consist of six formally bonding H *s*-Fe *d* combinations, *a*<sub>1g</sub>, *t*<sub>1u</sub> and *e*<sub>g</sub>, and three formally nonbonding *t*<sub>2g</sub> bands, providing the thermodynamically stable complex hydride due to the absence of any anti-bonding H *s*-Fe *d* occupations. Since there is modest contribution of Y 5*sp* and Li 2*sp* states (see Fig. 5 in the text) to the valence bands, Y and Li can be thought as the trivalent Y<sup>3+</sup> and Li<sup>+</sup> which donate a total of four electrons to the FeH<sub>6</sub> unit, pointing to the charge state Y<sup>3+</sup>Li<sup>+</sup>[FeH<sub>6</sub>]<sup>4-</sup>.

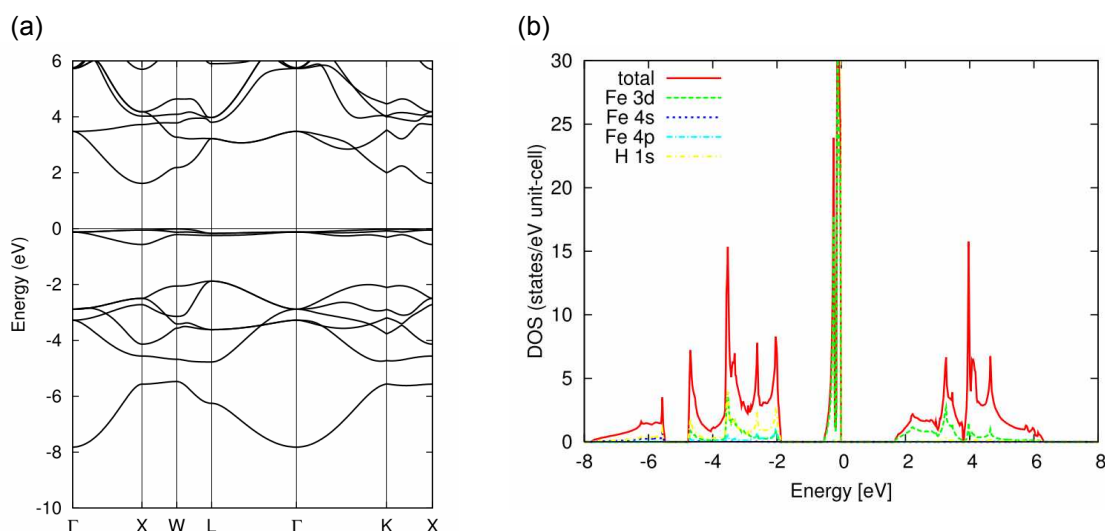

**Figure S1.** (a) Calculated band structure along the high-symmetry line in the Brillouin zone and (b) electronic density of states and H 1s, Fe 3d, Fe 4s and Fe 4p projections of relaxed 9 atom primitive cell of YLiFeH<sub>6</sub>. The energy zero is set at the valence-band maximum.

## **References**

- S1) H. Saitoh, A. Machida, Y. Katayama and K. Aoki, *Appl. Phys. Lett.*, 2009, **94**, 151915.
- S2) P. E. Blöchl, *Phys. Rev. B*, 1994, **50**, 17953; G. Kresse and D. Joubert, *Phys. Rev. B*, 1999, **59**, 1758.
- S3) J. P. Perdew, K. Burke and M. Ernzerhof, *Phys. Rev. Lett.*, 1996, **77**, 3865.
- S4) G. Kresse and J. Hafner, *Phys. Rev. B*, 1993, **47**, R558; G. Kresse and J. Furthmüller, *Phys. Rev. B*, 1996, **54**, 11169.
- S5) H. J. Monkhorst and J. D. Pack, *Phys. Rev. B*, 1976, **13**, 5188.
- S6) S. V. Halilov, D. J. Singh, M. Gupta and R. Gupta, *Phys. Rev. B*, 2004, **70**, 195117.
